# Supplementary material for: Conservation and Immunogenicity of Novel Antigens in Diverse Isolates of Enterotoxigenic Escherichia coli
Source: PLOS journal article supplement (doi:10.1371/journal.pntd.0003446), 2015-01-28
Supplement: S4 (10.1371/journal.pntd.0003446.s004) [file journal.pntd.0003446.s004]

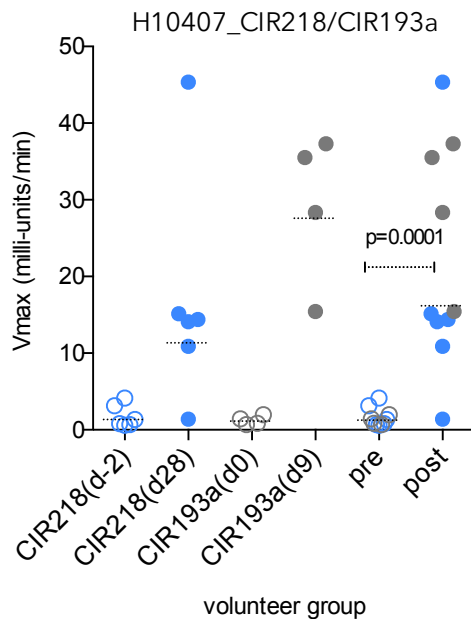

Figure S4. Immune responses to EtpA following volunteer challenge with ETEC H10407.  
 All sera were diluted 1:4096 prior to testing against rEtpA-myc-6His followed by detection of total antibody (IgM,IgG,IgA) in kinetic ELISA. Pre and post values (open and closed circles, respectively) represent collective data from 2 independent ETEC H10407 challenge studies CIR218 and CIR193a. Data from CIR218 are shown as pre-challenge (d-2, open blue circles) and (d28, closed blue circles), while data from CIR193a appear as open grey circles (pre-challenge, d0) and closed grey circles (post challenge, d9). Dashed horizontal lines represent geometric means. P value represents comparison of pre and post-challenge samples by Mann Whitney 2-tailed analysis.
